# Supplementary material for: Assessment of Haemostasis in Disseminated Intravascular Coagulation by Use of Point-of-Care Assays and Routine Coagulation Tests, in Critically Ill Patients; A Prospective Observational Study
Source: PLoS One. 2016 Mar 9;11(3):e0151202. doi: 10.1371/journal.pone.0151202 (PMC4784845; doi:10.1371/journal.pone.0151202)
Supplement: S1 Data — (XLS) [file pone.0151202.s001.xls]

## Sheet: Sammanställning
Sampling	Day after	30-day								Nr SIRS				ExTem	ExTem	ExTem	FibTem						PLT inhibitors
occasion	arrival	Mortality	Days at ICU	Diagnos	PLC	PT	APTT	d-dimer	fibrinogen	criteria	ADP-AUC	COL-AUC	TRAP-AUC	CT	MCF	ML	MCF	SOFA	ISTH DIC	JAAM DIC	SAPS	EMR		antikoagulantia	plasma 24h	SAG 24h	Trc-24h	Sex	Age
1	3	No	7	Surgery	210	1.3	31	3.4	4	1	34	68	72	62	60	20	30	4	1	2	60	35.6	1	1	1	1	1	1	78
2	4				230	1.3	31	3.4	4	1	46	82	88	60	66	21	24	4	1	2
3	5				224	1.3	31	3.4	4	1	81	112	100	70	70	20	29	3	1	2
1	0	No	2	sepsis	411	1.3	32	2.2	7.4	1	116	95	174	54	78	11	38	4	3	4	63	41.9	2	2	1	1	1	1	57
1	0	No	3	sepsis	163	1.6	35	2.7	2.5	3	88	116	169	58	58	0	15	6	2	3	59	33.5	1	2	2	2	2		61
2	1				126	1.9	39	1.8	2.6	3	71	132	122	63	59	6	15	7	2	3
3	3				118	2.3	37	2.5	2.7	3	76	140	167	52	60	0	20	6	2	4
4	6				111	2.1	38	1.7	2.9	3	79	132	129	90	51	6	15	3	2	4
1	0	No	2	trauma	144	1.5	29	1	3.4	0	55	82	104	46	66	5	15	3	1	1	34	3.1	1	1	1	2	1		24
2	0				144	1.5	29	1	4.8	0	80	122	132	53	65	12	17	3	1	1
4	2				203	1.4	28	2.8	5.2	0	46	69	63	56	67	8	25	4	1	1
1	2	No	21	sepsis	191	1.4	49	3.3	5.4	2	33	75	81	98	52	57	19	10	1	2	67	50.4	1	2	2	2	1		76
2	5				176	1.4	30	4.3	5.4	2	83	112	118	54	67	9	22	13	3	4
3	6				211	1.4	30	4.3	7.8	2	109	167	164	57	68	10	26	13	3	5
4	7				272	1.5	28	4	7.9	2	115	177	151	64	67	25	32	11	2	2
5	8				371	1.6	28	4	5.6	2	124	205	170	71	71	26	34	13	2	2
1	3	No	4	Medical	131	1.4	30	1.6	5.5	3	132	148	133	67	57	13	17	4	2	3	70	56.5	2	2	1	1	1	1	75
2	4				180	1.3	30	1.9	5.5	3	65	112	149	59	62	0	19	3	1	3
1	2	Yes	4	sepsis	214	1	39	0.79	7.5	3	35	79	62	48	75	11	43	6	1	2	91	85.6	1	1	1	1	1		65
2	3				214	1	39	0.79	7.5	3	46	78	82	54	74	11	45	6	1	2
1	0	No	6	Sepsis	115	1.3	26	0.82	3.2	2	39	57	75	44	58	12	19	7	1	2	76	67.5	1	2	2	2	2		63
2	1				124	1.3	28	0.8	4.7	2	30	65	84	49	61	12	41	6	1	2
3	3				131	1.3	34	1.5	5.9	2	62	76	107	49	57	15	19	7	1	2
4	4				143	1.3	34	1.5	5.9	2	29	48	40	54	61	12	27	5	1	2
5	8				306	1.4	28	4.5	6.6	2	72	107	97	56	67	14	34	4	2	2
6	9				333	1.4	28	6.3	6.1	2	106	106	99	60	70	13	36	3	2	2
1	1	No	6	Sepsis	200	1.6	37	0.9	3.5	1	53	81	115	59	61	0	13	4	2	2	42	8	1	2	1	2	1		59
2	2				153	1.4	39	0.14	5.9	1	33	58	47	55	63	9	16	5	1	1
3	3				200	1.3	35	0.27	7.3	1	57	92	85	49	65	8	20	3	0	1
1	0	No	3	Medical	42	1.4	33	3.6	3.5	4	24	83	158	54	52	0	10	10	5	6	52	20.5	1	2	1	2	1	1	32
2	1				31	1.4	33	3.6	3.5	4	41	62	58	35	56	0	15	9	5	6
3	2				28	1.5	32	4	3.9	4	37	90	140	42	54	0	16	8	5	6
1	0	No	3	sepsis	230	1.3	36	0.9	6	3	31	75	59	57	62	13	27	7	1	3	39	5.7	1	3	1	1	1	1	32
1	2	Yes	25	Sepsis	120	1.4	38	1.7	7.5	3	32	47	52	57	62	13	27	6	2	4	60	35.6	1	2	1	1	1	1	77
2	3				148	1.4	33	1.5	7.5	3	44	74	69	54	67	5	29	3	2	3
3	4				186	1.5	31	8	7.5	4	38	65	58	57	69	6	50	3	4	5
4	5				204	1.4	29	6.6	7.3	3	80	105	108	50	71	6	32	3	4	5
5	9				348	1.9	47	1.3	5.7	3	122	184	176	77	76	6	37	10	2	3
1	3	No	10	sepsis	127	4.7	52	0.6	4.2	3	63	146	117	97	63	0	20	10	3	3	61	37.7	1	2.4	1	2	1		64
2	4				148	3	40	0.4	4.4	3	63	130	135	151	64	0	18	8	2	2
3	5				192	1.4	35	0.29	4.6	3	62	107	97	57	66	11	22	8	1	2
4	6				226	1.4	35	0.41	5	3	40	84	104	67	65	15	23	9	1	2
5	7				260	1.3	35	0.41	6	3	38	103	118	58	71	9	26	7	0	1
1	0	No	2	Medical	117	0.9	29	2.7	4.7	2	45	69	57	52	64	0	18	4	1	2	23	0.6	1	3	1	1	1	1	28
2	1				120	1	30	2.5	4.5	2	37	69	68	39	66	7	23	3	1	2
1	1	No	4	Surgery	47	1.1	26	10	2.3	3	8	50	41	71	31	0	15	8	5	7	52	20.5	2	1	1	1	1	1	47
1	3	Yes	10	Sepsis	19	1.7	55	1.4	5.7	3	3	2	3	67	40	0	22	19	4	6	82	76.3	1	1	1	2	2	1	34
2	5				6	1.8	43	2.8	5.3	3	2	1	2	86	37	0	19	20	4	6
3	6				31	1.8	42	4.4	4.4	3	2	0	1	77	32	0	21	23	6	8
4	7				8	2.2	44	8	4.7	3	13	8	24	77	42	0	21	23	6	8
1	1	Yes	3	Sepsis	67	1.9	67	4.6	6.4	3	14	33	32	86	58	12	18	13	5	8	76	67.5	1	1	1	1	1	1	62
1	0	No	6	Surgery	292	1.4	27	1.2	4.6	3	156	173	219	45	69	34	32	6	2	3	55	25.7	1	1	2	2	2		55
2	0				292	1.4	27	1.2	4.6	2	142	137	200	45	67	24	26	6	2	2
3	1				223	1.3	28	0.81	5.4	2	25	157	118	47	69	30	28	4	1	2
4	2				276	1.3	28	0.63	5.9	2	65	101	74	50	67	21	22	5	1	2
1	2	Yes	2	Cardiac arrest	130	1.4	39	0.17	4.1	2	24	57	70	101	62	26	14	17	1	1	65	46.2	2	2	1	2	1	1	71
1	1	No	4	Medical	430	1.2	26	0.15	3.6	0	128	106	185	44	66	28	16	2	0	0	34	3.1	1	1	1	1	1	1	57
2	2				408	1	24	0.15	3.7	0	84	100	162	50	66	33	22	0	0	0
1	1	No	2	trauma	110	1.9	36	1.6	3.8	3	34	61	79	85	58	16	10	11	2	4	58	31.5	1	1	1	1	1		46
1	1	No	5	trauma	130	1.4	30	5.8	3	1	51	73	67	61	58	24	9	10	4	4	46	12.1	1	1	1	2	1		42
2	2				102	1.5	32	6	4.3	1	28	45	45	72	54	24	9	12	4	5
1	1	No	1	Surgery	133	1.1	32	0.25	1.5	1	78	122	127	63	57	17	11	1	0	0	34	3.1	1	2	1	1	1	1	38
1	0	No	2	Medical	273	1.1	28	3.8		2	81	165	161	49	63	22	17	5	0	0	52	20.5	2	2	1	1	1
1	1	No	2	Medical	232	1.3	32	0.5	3.4	1	69	86	91	47	65	30	18	6	1	2	57	29.5	1	2	1	1	1	1	47
2	2				213	1.2	27	0.53	3.5	1	73	111	130	43	62	18	16	5	1	1
1	1	No	11	sepsis	14	2	50	0.8	1.5	2	3	4	6	172	27	0	3	18	4	5	88	83	1	1	2	2	2		46
2	2				14	1.7	50	0.5	2	1	10	4	3	257	18	0	3	18	3	4
3	2				11	1.7	50	0.5	2	2	14	11	10	22	25	0	4	18	3	4
4	3				12	1.4	37	0.5	5.9	2	3	3	2	288	15	0	0	17	4	5
5	4				10	1.4	34	0.7	7	2	0	5	4	130	22	0	3	16	4	5
6	5				20	1.4	31	0.6	10	2	3	25	21	196	23	0	4	12	4	5
7	9				52	1.4	25	2.5	10	2	53	36	112	69	46	17	14	13	3	5
1	0	No	3	Medical	158	1.1	49	0.35	4.8	3	83	77	110	56	71	12	29	8	0	1	75	65.8	1	2	1	1	1	1	80
2	1				146	1.1	54	0.22	5.2	2	65	72	89	52	73	4	28	7	0	0
1	2	No	4	Surgery	177	1.2	33	0.2	7.4	0	46	81	110	69	72	13	31	2	0	0	41	7.2	1	2	1	2	1		47
2	3				176	1.2	32	0.27	7.3	0	63	117	169	64	71	17	34	1	0	0
1	6	Yes	8	Surgery	18	1.3	?	0.33	0.5	2	9	30	6	334	17	0	0	18	3	4	87	82	1	1	1	2	1	1	77
2	7				37	1.4	150	0.37	0.5	2	9	58	40	231	22	0	4	19	4	4
1	1	Yes	4	Medical	130	1.4	27	0.3	2	4	61	101	159	57	58	42	7	8	1	2	65	46.2						1	75
2	2				106	1.4	31	0.27	5.2	3	31	83	79	50	63	12	25	7	1	3
1	1	No	2	Medical	144	0.9	22	3.7	2.9	1	39	95	124	48	61	22	19	6	1	1	48	14.5	1	2	1	1	1	1	43
1	0	Yes	5	Medical	336	1.2	32	2.7	6.6	3	148	136	206	23	65	67	24	8	1	2	87	82	1	3					79
2	1				315	1.4	31	6.2	5.8	3	118	149	187	62	72	56	33	12	4	5
3	2				312	1.3	44	3.2	6.6	2	100	144	185	62	70	45	30	13	1	1
1	0	No	1	Trauma	229	1.1	23	5.5	2.4	1	91	136	137	18	58	20	11	4	3	3	34	3.1	1	1					24
1	0	No	2	Medical	199	1.4	32	1.4	7.4	2	41	70	56	58	74	10	32	3	2	2	48	14.5	1	2					52
1	4	No	6	Medical	52	1	40	0.27	4.4	1	5	16	44	59	50	7	32	11	1	3	17	46.2	1	1	1	1	1		42
2	5				43	1	41	0.57	4.4	1	0	11	33	60	52	0	26	9	3	4	65	46.2
1	0	No	1	Surgery	255	1.1	44	0.57	5.4	0	42	84	72	39	74	10	27	7	1	1	42	62.2	1	1	1	2	1	1	84
1	6	No	23	Medical	81	1.2	34	3.2	5.5	3	26	54	59	59	63	0	37	14	2	3	30	9.9	1	2	1	2	1	1	68
2	7				97	1.2	34	3.1	5.5	3	32	45	48	58	68	9	38	12	2	3	44
3	8				111	1.3	35	2.9	5.1	3	34	56	44	76	62	9	43	11	1	2
4	9				141	1.3	35	2.4	5.1	3	54	67	92	61	65	8	32	7	1	2
1	4	No	12	Trauma	276	1.1	27	1.3	2.5	2	69	89	110	50	73	13	36	7	1	0	62	40	1	1	1	1	1	1	63
2	5				276	1.1	27	1.1	2.5	2	75	81	98	44	72	13	28	7	1	0
3	6				309	1.1	29	0.35	6.7	2	58	90	96	51	71	13	47	7	0	0
4	7				309	1.1	29	0.35	6.7	2	70	93	79	50	68	22	31	7	0	0
5	10				563	1.1	29	0.35	6.7	2	114	125	126	66	73	15	70	7	0	0
3	4	No	13	Medical	169	0.9	32	0.9	8.5	1	90	82	116	55	83	0	53	10	1	0	73	62.6	1	2	1	2	1	1	22
4	5				188	0.9	32	0.9	8.5	1	74	82	112	58	70	14	36	11	1	0
5	6				236	1	31	0.83	7.5	1	107	83	113	67	71	13	29	10	0	0
6	7				277	1	31	0.81	7.5	1	117	121	128	56	74	17	41	10	0	0
1	2	Yes	17	Sepsis	83	2	81	2.4	3.5	3	31	68	91	58	58	5	13	9	3	4	77	69.1	1	2	1	2	1	1	79
2	3				75	1.5	49	2.6	4.8	3	46	75	119	48	60	4	20	7	4	6
3	4				65	1.5	49	2.6	4.8	3	32	49	74	52	58	3	21	11	4	6
4	5				74	1.5	33	3.4	4	3	35	37	71	51	62	3	43	12	4	6
5	6				91	1.9	37	3	4.4	4	46	65	81	101	64	8	19	8	3	4
6	9				162	1.6	32	4	3.7	4	104	113	111	63	66	7	25	5	2	3
7	10				192	1.5	30	3.3	4.5	3	102	123	110	56	72	2	33	6	3	3
1	1	No	5	Trauma	348	1.2	27			2	72	76	100	77	72	14	47	5	0	0	41	26.6	1	1	1	1	1		42
2	4				272	1.2	27			2	105	89	135	55	74	13	40	5	0	0
1	1	No	1	Medical	129	1.8	45	2.7	5.9	2	76	62	99	59	60	7	14	9	2	2	49	15.9	1	1	1	1	1		49
1	1	No	1	Sepsis	168	2	42	1.1	4.8	2	92	74	110	74	70	10	32	6	0	0	57	29.5	1	2.4	1	1	1	1	78
1	0	No	1	Sepsis	32	1.2	28	2.5	2.2	3	8	12	12	59	42	0	12	12	3	5	83	77.6	1	1	1	2	1		53
2	1				12	1.3	42	0.94	3.2	3	2	0	2	53	38	0	23	12	3	6
1	0	Yes	1	Medical	320	1.1	28	0.67		1	94	78	127	62	66	16	19	5	1	1	76	67.5	2	1	1	1	2	1	71
1	1	Yes	1	Medical	358	1	31	1.2	7.2	0	108	82	119	71	77	11	49	3	1	1	66	48.3	2	2	1	2	1	1	68
1	0	Yes	2	Cardiac arrest	223	0.9	46	0.88	1.8	1	66	74	127	85	59	0	13	8	0	0	80	73.6	1	1	1	1	1	1	69
1	0	No	18	Sepsis	188	1.5	31	2.2		3	86	109	99	64	58	10	30	13	2	3	80	73.6	1	2	1	2	1		60
2	1				187	1.8	36	2.1	3	3	60	92	106	61	61	6	31	15	2	3
3	2				120	2	35	2.1	3.2	3	37	75	74	80	61	0	22	15	2	3
4	3				104	1.8	32	1.9		3	44	98	75	100	58	6	23	18	2	4
5	4				117	1.7	30	2.8		3	37	72	70	98	65	2	28	17	2	4
6	7				107	1.4	27	4.9	4.4	3	40	75	85	91	64	1	30	11	4	6
1	6	No	7	Surgery	219	1.1	28				85	87	135	52	65	8	25	3			52	20	1	1	1	1	1	1	58
1	1	No	1	Medical	63	2	41	1.3	1.2	3	42	25	72	48	44	12	7	6	3	6	49		1	1	1	2	2		60
2	2	No	2	Medical	141	1.1	31				47	52	73	67	62	9	20	2					na	na				1	76
1	1	No	2	Cardiac arrest	169	1	30	0.21	3.4	0	24	46	78	74	67	0	13	12	0	0	60	35.6	2	1	1	1	1	1	74
1	0	No	1	Surgery	94	1.2	45	0.2	5.6	1	22	68		183	56		28	6	1	1	62	39.8	1	1	1	2	1		23
1	1	No	1	Surgery	175	1.5	42	0.51		1				131	49		15	1	2	2	43	8.9	1	1	1	1	1		69
1	3	No	5	Medical	83	1.3	36	1.6	4.7	1	10	36		50	59		22	9	2	2	42	8	1	1	1	2	2	1	58
1	1	No	1	Surgery	154	2.2	42	3.7	2.5	0				69	53		11	3	2	2	41	7.2	1	1	1	1	1		63
1	0	No	16	Trauma	70	1.3	35	3.3	3.3	2				83	54		9	10	3	5	76	67.5	1	1	1	2	1		35
2	1				76	1.5	49	2.8	6.5	2	21	60		99	55		20	8	4	5
1	3	No	1	Trauma	259	1.3	32	0.47	6.5	1				54	67		31	4	0	1	46	12.1	1	1					55
1	1	No	1	Medical	106	1.4	40	1.5	1.9	1	29	40		120	48		8	7	2	3	53	22.1	1	2	2	2	1		49
2	2				85	1.4	38	1.5	4	1	31	35		221	56		18	5	3	4
1		No	2	Surgery	171	1.4	56			1	91	97		54	48		10	6			49	15.9	1	1				1	69
1	1	Yes	1	Cardiac arrest	32	1.4	42	10	7.5	1	3	5		119	55		36	16	6	7	127	97.9	2	1				1	74
1	3	No	4	Medical	187	1.2	46	1	6.6	2	55	92		40	69		35	0	1	1	67		1	1	1	1	1	1	83
1	0	No	14	Trauma	92	1	38	1.1	2.2	3	3	9	17	50	39		10	15	2	4	52	20.5	1	1	2	2	2		39
2	0				70	1	36	4.3	2.7	3	8	17	29	103	46		11	15	4	7
1	1	Yes	2	Trauma	84	1.1	32	2.2	1.9	0	17	70	99	64	43		11	6	2	2	68	52.5	1	1	1	2	1		71
1	0	No	5	Sepsis	103	1.3	39	0.33	5	1	39	95	54	88	61		18	6	0	1	66	48.3	1	1	2	1	1		72
2	9	Yes	10	Sepsis	16	1.1	31	0.64	3.9	3	24	11	27	33	34		19	17	3	5	82	76.3	1	1		2			66
1	7	Yes	9	Sepsis	17	1.3	47	0.54	4.4	1	12	32	32	60	38		19	15	3	5	94	87.9	1	1	2	1	1		74
2	8				19	1.4	43	0.64	3.4	1	14	20	25	102	40		13	15	4	5
1	4	Yes	5	Medical	134	1.3	52	0.58	4.3	2	50	82	76	67	54		14	7	1	2	77	69.1	1	1				1	79
1	0	Yes	4	Cardiac arrest	93	1.1	29	4.9	2.8	3	60	77	137	35	57		12	11	4	5	83	77.6	2	1	1	1	1		79
2	2				77	1.3	49	0.2	4.6	3	32	57	93	59	65		19	13	1	4
3	3				43	1.3	47	0.2	6.4	3	17	44	62	74	58		19	16	2	4
1		No		Surgery	111	1.1	32		2.7		20	30	40	83	48		14						1	1
1	1	Yes	16	Medical	14	1.2	47	3.3	6.2	3	1	1	1	129	36		29	11	3	5	96	89.1	1	1	1	1	2	1	72
3	2				15	1.8	66	6.3	5	3	4	3	3	122	35		21	18	6	7
4	3				11	1.2	53	2.8	4.2	3	2	3	3	80	36		25	18	3	5
5	7				5	1.3	42	0.99	3.3		2	0	2	389	46		14	17	3	5
1	1	Yes	1	Surgery	224	1.7	57	0.61	6.2	0	62	85	72	80	72		33	6	2	2	66	48.3	1	1					85
1	3	No	9	Trauma	70	1.3	58	4.3	4.7	1	22	39	43	215	59		21	11	4	7	55	25.7	1	1	1	2	1		26
1	0	No	4	Sepsis	114	1.1	38	0.53	7.5	3	50	96	78	72	57		30	11	1	3	74	64	1	1	1	1	1		65
1	1	No	3	Sepsis	332	1.3	51	1.4	5.6	4	57	137	107	55	61		17	6	1	3	72	60.4	1	1	1	2	1	1	83
1	1	Yes	3	Cardiac arrest	169	1.2	40	10	3.8	2	75		111	279	56		14	7	3	3	78	70.7	2	1	1	1	1		78
1	2	No	27	Sepsis	8	1.8	77	1.1	4.7	2	1	3	2	82	14		12	21	6	7	81	75	1	1	2	2	2	1	67
2	5				9	1	44	6.6	5.2	2	3	17	13	62	33		18	12	5	6
4	7				44	1.1	44	7.6	5.8	2	9	30	36	68	16		45	12	5	6
6	9				59	1.2	42	7.4	3.3	2	42	107	0	101	46		9	10	4	6
7	10				128	1.1	41	2.7	3.3	2	68	166	208	57	55		8	10	3	1
1	0	Yes	1	Surgery	120	1.2	38	0.99	3.7	0	73	80	67	50	63		15	4	1	2	61	37.7	1	1	1	1	1		82
1	4	No	7	Trauma	185	1	43	0.26	7.5	2	7	75	67	65	70		21	5	0	0	57	29.5	1	1	1	1	1		58
2	5				225	1	44	0.29	7.5	2	21	21	51	70	73		38	5	0	0	55	25.7
1	0	No	0	Medical	66	1.2	38				33	126	82	50	61		14						1	1					80
2	1	No	2	Surgery	145	1.4	48	0.55	3.8	1	100	131	78	63	61		19	3	2	2	46	12.1	1	1					65
1	2	Yes	3	Surgery	114	1.2	37	10	2.9	2	38	93	66	64	68		25	8	1	1	65	46.2	1	1	2	1	1	1	62
1	1	No	3	Medical	146	1.4	58	1.2	7.5	1	35	63	93	92	75		34	4	2	2	76	67.5	1	1	1	1			69
1	0	No	1	Medical	174	1.3	29	0.59	3.2	2	26	38	45	54	59		7	2	1	2	57	29.5	1	1	1	1	1		77
1	2	No	8	Trauma	105	1.4	44	4.2	3.3	1	35	78	84	75	60		14	8	4	5	54	29.3	1	1	1	2	1		70
1	1	No	4	Trauma	95	1.3	37	1.2	5.8	1	47	67	76	46	58		20	7	2	3			1	1	1	2	1		61
1	2	No	5	Trauma	124	1.1	26	0.96	4.1	1	62	70	106	16	66	11	16	7	1	1	50	17.3	1	1	1	2	1		54
2	3				144	1.1	27	0.88	5.4	1	84	79	95	61	66	14	32	6	1	1
1	1	Yes	3	Medical	150	1	26	0.13	2.2	1	83	61	122	61	60	6	15	4	0	0	55	26	1	1	1	1	1		69
1	0	Yes	3	Medical	168	3.5	31	0.66	3.7	1	73	100	150	120	63	0	19		3	2	71	58.5	2	2	1	2	1	1	71
2	1				112	1.2		0.45	4.2	1	89	85	148	64	63	0	22		0	1
1	5	No	1	Medical	130	1.1	30	5.5	1.7	2	73	100	150	99	57	8	6		3	3	51	19	1	1	1	2	1	1	40
2	6				128	1.1	28	4.8	2.4	2	19	26	90	71	60	10	15	5	3	3
1	0	Yes	12	Cardiac arrest	263	1	34	3.1	3.6	1				55	72	5	20	7	1	1	33		2	2	1	2	1		62
1	4	No	12	Surgery	397	1.4		2.1	3.2	1	29	188	106	55	77	15	58	2	2	2	67	50.4	1	1	1	1	1		71
2	5				414	1.7		1.8	2.7	1	105	195	130	53	76	13	56	2	2	2
1	1	No	1	Surgery	239	1.4		0.19	3.5	1	114	116	160	69	65	6	19	2	1	1	60	35.6	1	2	1	1	1		83
1	0	No	2	Sepsis	259	1.3	30	2.2	3.9	0	124	111	131	73	67	4	23	6	1	2	61	37.7	1	2	2	2	1		71
1	0	Yes	11	Medical	358	3.3	44	0.26	7	3	117	139	94	254	76	13	48	12	2	2	72	60.4	1	2	1	2	1	1	81
2	1				327	2.7	43	0.16	6.8	3	128	145	128	174	75	8	39	8	2	2
3	2				331	1.6	31	0.16	5.1	3	123	146	141	87	77	10	43	6	1	2
4	3				235	1.4	28	0.16	4.3	3	115	137	163	75	72	10	34	6	1	2
5	8				167	1.1	23	0.16	2.4	3	105	130	104	51	64	0	22	5	0	1
1	2	No	4	Trauma	93	1.6		1.7	3.5	1	26	44	61	54	61	0	16	7	3	4	61	37.7	1	1	1	2	2		23
2	3				111	1.4	31	1.7	5	1	31	53	59	47	68	8	25	7	2	4
1	2	No	20	Trauma	163	1.5	39	1	3.7	2	39	61	58	57	67	5	22	14	2	2	66	48.3	1	1	2	2	1	1	19
2	3				142	1.4	37	1.7	6.7	2	29	44	45	60	68	5	29	12	2	2
3	4				113	1.6	38	2.8	5.7	2	10	39	29	81	61	0	21	12	2	3
4	5				103	1.5	35	3.5	4.1	2	16	37	48	83	59	0	17	13	2	3
5	10				402	1.4	29	2	3.5	2	122	110	154	70	75	4	46	7	2	2
1	1	No	2	Cardiac arrest	176	1	33	0.8	2.7	0	73	43	96	64	69	11	22	6	1	1	69	54.5	2	2	1	2	1	1	72
1	1	Yes	2	Medical	71	1.2	30	2	1.5	1	22	35	77	85	41	3	6	6	2	4	75	65.8	1	2	1	2	1		78
2	2				47	1.2	33	0.4	1.4	1	32	23	65	154	31	0	4	6	2	3
3	2	Yes	4	Medical	441	1.4	38	1.1	4.5	1	161	67	173	61	74	8	41	6	2	2	82	76.3						1	81
1	2	No	10	Sepsis	158	1.3	41	1.9	8	4	73	78	85	58	73	11	40	7	1	3	60	35.6	1	2	1	2	1	1	44
2	3				178	1.3	30	3.9	6.8	4	56	72	69	78	74	11	42	4	1	3
3	4				171	1.5	29	2.5	8.3	4	63	74	19	73	74	8	51	7	2	3
4	5				199	1.7	28	2.3	6.4	4	113	115	111	67	73	8	39	5	2	3
5	6				219	1.9	29	3	7.3	4	122	129	126	76	72	10	29	4	2	3
6	9				289	1.5	25	3.9	6.4	4	92	148	148	73	72	6	50	1	2	3
1	1	No	5	Cardiac arrest	314	1.1	30	0.18	3.8	1	20	69	72	54	73	4	19	7	0	0	57	29.5	2	2	1	1	1		55
2	2				335	1.2	31	0.18	4.6	1	23	76	91	68	77	5	30	5	0	0
3	3				401	1.1	30	0.3	7.7	1	33	87	103	64	79	6	39	4	0	0
4	4				425	1	31	0.2	6	1	30	89	124	65	81	7	42	4	0	0
5	5				492	1	26	0.28	8.5	1	32	76	126	80	83	7	39	4	0	0
1	1	No	3	Trauma	119	1.2		0.61	7.3	1	80	91	102	59	75	9	38	6	1	2	57	29.5	1	1	1	1	1		73
3	3				150	1.3	30	1.6	8	1	114	123	148	70	77	7	39	8	1	1
1	0	No	3	Surgery	245	1.5	37	1.2	2.8	2	102	95	159	75	67	5	17	5	2	2	46	12.1	1	2	1	2	1		61
2	1				262	1.4	38	2.1	5.4	2	84	93	107	71	72	8	35	3	2	2
1	1	No	1	Medical	115	1.7	35	0.13	1.5	1	52	73	84	61	57	2	19	11	1	2	82	76.3	1	1	1	2	1		71
1	0	Yes	2	Surgery	69	1.8	63	10	0.8	1				175	36	0	0	15	6	7	65	46.2	1	1	2	2	2		71
1	2	No	7	Sepsis	111	1.2	39	0.36	7.8	2	46	51	51	83	73	7	29	6	0	1	84	78.8	1	2	1	1	1		72
4	5				145	1.2	37	0.62	9	2	55	57	68	67	75	5	49	4	1	1
1	0	No	1	Medical	192	1	32	5.7	4.4	1	64	61	82	119	71	7	35		3	3			1	3	1	1	1	1	49
1	3	Yes	5	Sepsis	10	1.4	39	0.36	3.5	3	88	81	119	60	56	8	12	17	3	5	75	65.8	1	1	1	2	2		66
2	4				10	1.4	43	0.45	3.4	3	2	3	8	95	30	0	25	17	3	5
3	5				9	1.3	36	0.8	3.3	3	5	4	2	98	25	0	32	17	3	6
1	1	Yes	3	Sepsis	244	1.5	32	1.2	4.1	2	141	130	161	80	69	10	20	8	2	2	73	62.2	1	2	2	2	1	1	78
1	0	Yes	1	Cardiac arrest	240	3.3	150	9.2	3.1	4	75	94	82	141	71	3	20	12	5	5	79	72.2	2	2	1	1	1		81
1	3	No	9	Sepsis	94	1.3	34	1.4	6.7	3	40	62	74	57	68	3	30	15	2	4	68	52.5	1	2	1	2	1		52
2	4				151	1.4	28	1	5.4	3	73	104	149	59	70	4	35	14	2	3
3	5				207	1.3	27	1		3	124	139	151	55	71	6	31	12	1	3
4	6				252	1.3	29	0.77	6.3	3	149	138	165	272	71	5	36	13	1	3
5	7				287	1.2	28	0.72	5.8	3	141	151	158	59	77	5	45	11	1	2
6	9				511	1.2	23	1.2	3.5	3	123	137	193	60	72	11	33	5	1	2
1	0	Yes	1	Medical	102	1.3	53	1	3.7	2	90	101	119	58	63	0	25	9	1	3	37		1	2	1	2	1		72
1	1	No	4	Medical	479	1.2	25	2.3	6.8	1	132	121	145	112	63	7	34	5	1	1	39	5.7		2	1	1	1	1	36
1	2	No	9	Sepsis	100	1.3	35	0.51	6.8	2	40	59	72	67	68	10	31	10	2	3	53	22.1	1	2	1	1	1		76
2	3				133	1.1	34	0.74	8	3	60	91	86	72	69	7	38	10	1	2
3	4				146	1.1	34	0.8	8.9	3	51	87	73	64	74	6	43	9	1	2
1	4	No	7	Trauma	171	0.8		1.2	2.4	1	76	75	115	58	64	11	27	8	1	1	66	48.3	1	1	1	2	2		62
2	5				227	1.2	27	0.9	3.1	1	100	97	128	58	68	13	27	5	1	1
1	1	No	14	Surgery	176	1.8	39	3.8	2.2	2	68	74	100	74	56	11	9	7	2	2	42	8	1	2	1	2	1		57
2	4				188	1.5	37	2.7	5.1	2	76	74	86	62	68	7	23	4	2	2
4	9				305	1.6	31	3.5	4.4	2	141	100	134	70	75	10	36	6	2	2
5	10				496	1.5	29	1	4.4	2	128	135	141	60	76	16	34	5	2	2
1	0	No	5	Medical	162	0.9		4.3	3.7	2	55	70	104	66	61	14	15	9	1	1	78	70.7	1	2	1	1	1		79
2	1				170	1.4	34	3.2	3.7	2	90	82	92	60	64	14	19	8	2	2
3	3				190	1.2	36	2.1	4.6	2	76	82	104	38	64	16	23	4	1	1
1	0	No	1	Medical	365	0.9	25	0.62	3	2	93	89	126	55	65	6	17	4	1	1	48	14.5	1	2.3	1	1	1		63
2	1				264	1	38	0.31	2.6	3	77	69	103	47	65	9	17	3	0	1
1	1	No	4	Surgery	125	1.4	36	0.42	1.9	2	107	106	147	47	61	6	8	4	2	2	31	2.1	1	2	1	1	1		75
1	1	No	10	Surgery	101	1.3	33	1.1	1.8	2	54	60	91	65	54	6	10	10	1	2	66	48.3	1	2	2	2	2		76
2	2				124	1.6	55	0.72	4	2	66	70	73	52	56	7	16	7	2	2
3	3				115	1.4	50	0.44	4.1	2	39	56	88	53	75	0	17	7	2	3
4	4				99	1.2	44	0.5	4.8	2	38	46	68	53	58	8	23	7	2	2
5	6				140	1.1	33	0.61	6.1	2	50	52	65	65	66	5	30	4	1	1
6	8				223	1	30	0.42	6.7	2	79	94	67	78	71	5	38	4	1	1
1	1	No	2	Surgery	117	1.4	39	1.1	4.6	1	105	113	132	54	67	0	26	7	2	3	57	29.5	1	2	1	2	1		67
2	1				138	1.2	32	1.2	4.9	1	126	120	156	66	70	6	31	5	1	1	94	87.9
1	2	No	5	Medical	199	0.9	26	1.3	6.1	1	30	69	110	74	74	6	32	9	1	1	68	52.5	2	3	1	1	1		45
2	6				310	0.9	27	6.9	7.5	2	66	89	123	87	93	0	41	6	3	3
1	2	No	1	Medical	226	1.2	26	0.98	3.2	0	91	112	125	80	71	10	27	4	1	1	65	46.2	1	1	1	2	1		74
2	3				201	1.1	27	0.82	4.4	0	71	91	123	16	73	12	29	2	1	1
1	2	No	3	Trauma	146	1.3	29				63	76	126	72	60	11	15	8			75	65.8	1	2	1	1	1		61
2	3				144	1.3	29		4.3		68	73	126	71	62	13	19	8
1	1	No	1	Surgery	138	1.2	28	3.2	1.5	0	51	60	97	117	48	12	10	2	1	1	33	2.7	1	2	1	2	1		40
1	1	No	15	Medical	87	1	41	0.68	5.2	1	23	33	50	59	65	9	24	6	2	2	61	37.7		2	1	1	1		57
1	5	No	15	Surgery	329	1.3	31	3.8	6.4	2	104	114	134	95	70	0	45	8	1	2	63	41.9	1	2	2	2	1		71
2	6				362	1.3	31	2.5	7.5	2	131	128	126	76	77	7	50	7	1	2
3	7				371	1.3	32	1.8	7.7	2	138	141	128	71	76	7	47	7	1	2
4	8				404	1.2	29	1.9	7.1	2	129	137	140	85	76	6	46	5	1	1
1	1	Yes	4	Medical	313	1.3	33	2.1	4.3	3	111	139	130	95	70	6	23	9	1	3	60	35.6	1	2	1	1	1		80
2	2				299	1.4	31	1.8	3.5	3	132	167	147	105	69	0	28	9	2	3
3	3				250	1.4	33	2.1	3.1	3	109	137	152	100	66	5	20	8	2	3
2	2	No	5	Surgery	184	1.7	38	0.96	4.7	3	81	92	100	75	65	10	21		2	3	66	48.3							60
1	1	No	9	Sepsis	178	1.4	40	2	3.4	1	35	65	65	93	65	8	28	10	2	2	52	20.5	1	2	1	1	1	1	51
2	4				184	1.4	30	1	3.7	1	87	13	118	65	65	5	17	10	2	2
3	5				237	1.4	29	0.88	3.9	1	80	98	105	91	64	7	18	8	2	2
4	6				265	1.4	30	0.91	4.1	1	99	101	120	73	68	6	19	7	2	2
5	7				266	1.4	26	0.77	4.5	1	94	111	114	63	70	13	22	5	2	2
1	1	Yes	4	Cardiac arrest	214	1	29	0.36	4.2	0	79	50	120	58	68	6	23	10	0	0	52	20.5	2	2	1	1	1		81
2	2				207	1.1	32	0.77	4.3	0	11	34	56	64	69	6	24	11	1	1
3	3				181	1.2	39	0.52	4.8	0	15	38	72	71	69	9	24	10	1	1
1	1	Yes	2	Sepsis	66	1.3	44	10	1.2	1	94	132	170	87	42	7	8	17	4	7	62	39.8	1	1	2	2	1		88
2	2				44	1.5	58	10	1.7	1	65	100	100	100	40	6	8	20	6	7
1	4	No	8	Surgery	170	1.4	34	0.33	7.1	3	93	73	90	61	74	6	34	5	1	2	49	15.9	1	2	1	1	1	1	62
1	2	Yes	3	Sepsis	99	1.2	33	1.3	4.3	4	83	139	199	78	58	6	19	14	2	3	63	41.9	1	2	1	1	1		31
2	3				79	1.3	45	1.1	5.1	4	113	117	183	173	60	6	23	16	2	5
1	1	No	2	Sepsis	177	1.7	53	10	3.8	3	41	88	89	79	61	9	16	8	4	5	68	52.5	1	2	2	1	1	1	54
290	288		135		290	290	281	281	276	283	284	283	276	290	290	242	290	283	283	283	135	130						52	134
2	2		4		153.5	1.3	33	1.2	4.5	2	57.5	79	97	64	65	7.5	23	7	2	2	61	39.9							65
	1		2		102	1.2	30	0.6	3.4	1	31.75	57	67	55	58	4	16	5	1	1	50.5	20.5							52
	5		7		229.75	1.4	40	2.8	6.1	3	88	107	127	80	70	12	32	11	3	4	73	63.65							74.75
